# Supplementary material
Source: Springer Nature journal article supplement (https://www.springermedizin.de/resource/supplementary/13601_2014_1068_MOESM3_ESM.pdf/9678628)

# All penicillin-specific IgE

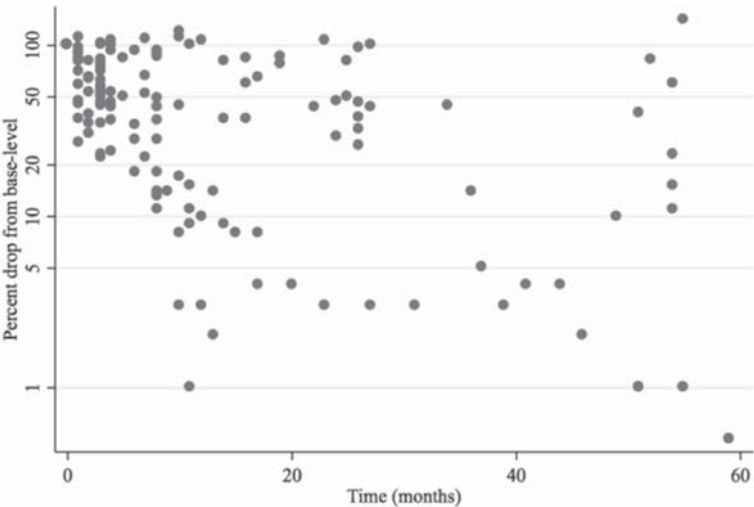

Supplement: MOESM3 [file 9678628]
